# Supplementary material
Source: publisher figshare collection journal article supplement (https://rs.figshare.com/ndownloader/files/8244734)
Supplement: Supplementary file 1 [file 8244734]

Hatching success (30 days).

| **nido** | **trat** | **cantidad** | **nacidos** |
| --- | --- | --- | --- |
| **29** | control30no | 1,0 | 1,0 |
| **29** | control30no | 1,0 | 1,0 |
| **29** | control30no | 1,0 | 1,0 |
| **29** | control30no | 1,0 | 1,0 |
| **29** | control30no | 1,0 | 1,0 |
| **29** | control30no | 1,0 | 1,0 |
| **29** | control30no | 1,0 | 1,0 |
| **29** | control30no | 1,0 | 0,0 |
| **29** | control30no | 1,0 | 1,0 |
| **29** | control30si | 1,0 | 1,0 |
| **29** | control30si | 1,0 | 1,0 |
| **29** | control30si | 1,0 | 1,0 |
| **29** | control30si | 1,0 | 1,0 |
| **29** | control30si | 1,0 | 1,0 |
| **29** | control30si | 1,0 | 1,0 |
| **29** | control30si | 1,0 | 1,0 |
| **29** | control30si | 1,0 | 1,0 |
| **29** | control30si | 1,0 | 1,0 |
| **29** | 30diasno | 1,0 | 1,0 |
| **29** | 30diasno | 1,0 | 1,0 |
| **29** | 30diasno | 1,0 | 1,0 |
| **29** | 30diasno | 1,0 | 0,0 |
| **29** | 30diasno | 1,0 | 0,0 |
| **29** | 30diasno | 1,0 | 1,0 |
| **29** | 30diasno | 1,0 | 1,0 |
| **29** | 30diasno | 1,0 | 1,0 |
| **29** | 30diasno | 1,0 | 1,0 |
| **29** | 30diassi | 1,0 | 1,0 |
| **29** | 30diassi | 1,0 | 0,0 |
| **29** | 30diassi | 1,0 | 0,0 |
| **29** | 30diassi | 1,0 | 1,0 |
| **29** | 30diassi | 1,0 | 0,0 |
| **29** | 30diassi | 1,0 | 1,0 |
| **29** | 30diassi | 1,0 | 1,0 |
| **29** | 30diassi | 1,0 | 0,0 |
| **29** | 30diassi | 1,0 | 0,0 |
| **33** | control30no | 1,0 | 1,0 |
| **33** | control30no | 1,0 | 1,0 |
| **33** | control30no | 1,0 | 0,0 |
| **33** | control30no | 1,0 | 1,0 |
| **33** | control30no | 1,0 | 1,0 |
| **33** | control30no | 1,0 | 0,0 |
| **33** | control30no | 1,0 | 1,0 |
| **33** | control30no | 1,0 | 1,0 |
| **33** | control30no | 1,0 | 1,0 |
| **33** | control30si | 1,0 | 1,0 |
| **33** | control30si | 1,0 | 1,0 |
| **33** | control30si | 1,0 | 1,0 |
| **33** | control30si | 1,0 | 1,0 |
| **33** | control30si | 1,0 | 1,0 |
| **33** | control30si | 1,0 | 1,0 |
| **33** | control30si | 1,0 | 1,0 |
| **33** | control30si | 1,0 | 1,0 |
| **33** | control30si | 1,0 | 1,0 |
| **33** | 30diasno | 1,0 | 1,0 |
| **33** | 30diasno | 1,0 | 1,0 |
| **33** | 30diasno | 1,0 | 1,0 |
| **33** | 30diasno | 1,0 | 0,0 |
| **33** | 30diasno | 1,0 | 0,0 |
| **33** | 30diasno | 1,0 | 1,0 |
| **33** | 30diasno | 1,0 | 1,0 |
| **33** | 30diasno | 1,0 | 1,0 |
| **33** | 30diasno | 1,0 | 1,0 |
| **33** | 30diassi | 1,0 | 0,0 |
| **33** | 30diassi | 1,0 | 0,0 |
| **33** | 30diassi | 1,0 | 0,0 |
| **33** | 30diassi | 1,0 | 1,0 |
| **33** | 30diassi | 1,0 | 1,0 |
| **33** | 30diassi | 1,0 | 1,0 |
| **33** | 30diassi | 1,0 | 1,0 |
| **33** | 30diassi | 1,0 | 0,0 |
| **33** | 30diassi | 1,0 | 1,0 |
| **49** | control30no | 1,0 | 1,0 |
| **49** | control30no | 1,0 | 1,0 |
| **49** | control30no | 1,0 | 1,0 |
| **49** | control30no | 1,0 | 1,0 |
| **49** | control30no | 1,0 | 1,0 |
| **49** | control30no | 1,0 | 1,0 |
| **49** | control30no | 1,0 | 1,0 |
| **49** | control30no | 1,0 | 0,0 |
| **49** | control30no | 1,0 | 1,0 |
| **49** | control30si | 1,0 | 1,0 |
| **49** | control30si | 1,0 | 1,0 |
| **49** | control30si | 1,0 | 0,0 |
| **49** | control30si | 1,0 | 1,0 |
| **49** | control30si | 1,0 | 1,0 |
| **49** | control30si | 1,0 | 1,0 |
| **49** | control30si | 1,0 | 1,0 |
| **49** | control30si | 1,0 | 1,0 |
| **49** | control30si | 1,0 | 0,0 |
| **49** | 30diasno | 1,0 | 1,0 |
| **49** | 30diasno | 1,0 | 1,0 |
| **49** | 30diasno | 1,0 | 1,0 |
| **49** | 30diasno | 1,0 | 1,0 |
| **49** | 30diasno | 1,0 | 1,0 |
| **49** | 30diasno | 1,0 | 0,0 |
| **49** | 30diasno | 1,0 | 1,0 |
| **49** | 30diasno | 1,0 | 1,0 |
| **49** | 30diasno | 1,0 | 1,0 |
| **49** | 30diassi | 1,0 | 1,0 |
| **49** | 30diassi | 1,0 | 0,0 |
| **49** | 30diassi | 1,0 | 1,0 |
| **49** | 30diassi | 1,0 | 0,0 |
| **49** | 30diassi | 1,0 | 0,0 |
| **49** | 30diassi | 1,0 | 0,0 |
| **49** | 30diassi | 1,0 | 1,0 |
| **49** | 30diassi | 1,0 | 0,0 |
| **49** | 30diassi | 1,0 | 1,0 |
| **149** | control30no | 1,0 | 1,0 |
| **149** | control30no | 1,0 | 1,0 |
| **149** | control30no | 1,0 | 1,0 |
| **149** | control30no | 1,0 | 1,0 |
| **149** | control30no | 1,0 | 1,0 |
| **149** | control30no | 1,0 | 1,0 |
| **149** | control30no | 1,0 | 1,0 |
| **149** | control30no | 1,0 | 1,0 |
| **149** | control30no | 1,0 | 1,0 |
| **149** | control30si | 1,0 | 1,0 |
| **149** | control30si | 1,0 | 1,0 |
| **149** | control30si | 1,0 | 1,0 |
| **149** | control30si | 1,0 | 1,0 |
| **149** | control30si | 1,0 | 1,0 |
| **149** | control30si | 1,0 | 1,0 |
| **149** | control30si | 1,0 | 1,0 |
| **149** | control30si | 1,0 | 1,0 |
| **149** | control30si | 1,0 | 0,0 |
| **149** | 30diasno | 1,0 | 1,0 |
| **149** | 30diasno | 1,0 | 1,0 |
| **149** | 30diasno | 1,0 | 1,0 |
| **149** | 30diasno | 1,0 | 1,0 |
| **149** | 30diasno | 1,0 | 0,0 |
| **149** | 30diasno | 1,0 | 1,0 |
| **149** | 30diasno | 1,0 | 1,0 |
| **149** | 30diasno | 1,0 | 1,0 |
| **149** | 30diasno | 1,0 | 1,0 |
| **149** | 30diassi | 1,0 | 1,0 |
| **149** | 30diassi | 1,0 | 1,0 |
| **149** | 30diassi | 1,0 | 0,0 |
| **149** | 30diassi | 1,0 | 1,0 |
| **149** | 30diassi | 1,0 | 1,0 |
| **149** | 30diassi | 1,0 | 0,0 |
| **149** | 30diassi | 1,0 | 1,0 |
| **149** | 30diassi | 1,0 | 1,0 |
| **149** | 30diassi | 1,0 | 1,0 |

Hatching success (60 days)

| **nido** | **trat** | **cantidad** | **nacidos** |
| --- | --- | --- | --- |
| nido 72 | 60diassi | 1 | 0 |
| nido 72 | 60diassi | 1 | 0 |
| nido 72 | 60diassi | 1 | 0 |
| nido 72 | 60diassi | 1 | 0 |
| nido 72 | 60diassi | 1 | 0 |
| nido 72 | 60diassi | 1 | 0 |
| nido 72 | 60diassi | 1 | 0 |
| nido 72 | 60diassi | 1 | 0 |
| nido 72 | 60diassi | 1 | 0 |
| nido 72 | 60diasno | 1 | 1 |
| nido 72 | 60diasno | 1 | 0 |
| nido 72 | 60diasno | 1 | 0 |
| nido 72 | 60diasno | 1 | 0 |
| nido 72 | 60diasno | 1 | 0 |
| nido 72 | 60diasno | 1 | 0 |
| nido 72 | 60diasno | 1 | 0 |
| nido 72 | 60diasno | 1 | 0 |
| nido 72 | 60diasno | 1 | 0 |
| nido 72 | control60si | 1 | 1 |
| nido 72 | control60si | 1 | 1 |
| nido 72 | control60si | 1 | 1 |
| nido 72 | control60si | 1 | 1 |
| nido 72 | control60si | 1 | 1 |
| nido 72 | control60si | 1 | 1 |
| nido 72 | control60si | 1 | 1 |
| nido 72 | control60si | 1 | 1 |
| nido 72 | control60si | 1 | 1 |
| nido 72 | control60no | 1 | 1 |
| nido 72 | control60no | 1 | 1 |
| nido 72 | control60no | 1 | 1 |
| nido 72 | control60no | 1 | 1 |
| nido 72 | control60no | 1 | 1 |
| nido 72 | control60no | 1 | 1 |
| nido 72 | control60no | 1 | 1 |
| nido 72 | control60no | 1 | 1 |
| nido 72 | control60no | 1 | 1 |
| nido 95 | 60diassi | 1 | 0 |
| nido 95 | 60diassi | 1 | 0 |
| nido 95 | 60diassi | 1 | 0 |
| nido 95 | 60diassi | 1 | 0 |
| nido 95 | 60diassi | 1 | 0 |
| nido 95 | 60diassi | 1 | 0 |
| nido 95 | 60diassi | 1 | 0 |
| nido 95 | 60diassi | 1 | 0 |
| nido 95 | 60diassi | 1 | 0 |
| nido 95 | 60diasno | 1 | 0 |
| nido 95 | 60diasno | 1 | 0 |
| nido 95 | 60diasno | 1 | 0 |
| nido 95 | 60diasno | 1 | 0 |
| nido 95 | 60diasno | 1 | 0 |
| nido 95 | 60diasno | 1 | 0 |
| nido 95 | 60diasno | 1 | 0 |
| nido 95 | 60diasno | 1 | 0 |
| nido 95 | 60diasno | 1 | 0 |
| nido 95 | control60si | 1 | 0 |
| nido 95 | control60si | 1 | 1 |
| nido 95 | control60si | 1 | 1 |
| nido 95 | control60si | 1 | 1 |
| nido 95 | control60si | 1 | 1 |
| nido 95 | control60si | 1 | 1 |
| nido 95 | control60si | 1 | 1 |
| nido 95 | control60si | 1 | 1 |
| nido 95 | control60si | 1 | 1 |
| nido 95 | control60no | 1 | 0 |
| nido 95 | control60no | 1 | 0 |
| nido 95 | control60no | 1 | 0 |
| nido 95 | control60no | 1 | 1 |
| nido 95 | control60no | 1 | 1 |
| nido 95 | control60no | 1 | 1 |
| nido 95 | control60no | 1 | 1 |
| nido 95 | control60no | 1 | 1 |
| nido 95 | control60no | 1 | 1 |
| nido 136 | 60diassi | 1 | 0 |
| nido 136 | 60diassi | 1 | 0 |
| nido 136 | 60diassi | 1 | 0 |
| nido 136 | 60diassi | 1 | 0 |
| nido 136 | 60diassi | 1 | 0 |
| nido 136 | 60diassi | 1 | 0 |
| nido 136 | 60diassi | 1 | 0 |
| nido 136 | 60diassi | 1 | 0 |
| nido 136 | 60diassi | 1 | 0 |
| nido 136 | 60diasno | 1 | 0 |
| nido 136 | 60diasno | 1 | 0 |
| nido 136 | 60diasno | 1 | 0 |
| nido 136 | 60diasno | 1 | 0 |
| nido 136 | 60diasno | 1 | 0 |
| nido 136 | 60diasno | 1 | 0 |
| nido 136 | 60diasno | 1 | 0 |
| nido 136 | 60diasno | 1 | 0 |
| nido 136 | 60diasno | 1 | 0 |
| nido 136 | control60si | 1 | 1 |
| nido 136 | control60si | 1 | 1 |
| nido 136 | control60si | 1 | 1 |
| nido 136 | control60si | 1 | 1 |
| nido 136 | control60si | 1 | 1 |
| nido 136 | control60si | 1 | 1 |
| nido 136 | control60si | 1 | 1 |
| nido 136 | control60si | 1 | 1 |
| nido 136 | control60si | 1 | 1 |
| nido 136 | control60no | 1 | 1 |
| nido 136 | control60no | 1 | 1 |
| nido 136 | control60no | 1 | 1 |
| nido 136 | control60no | 1 | 1 |
| nido 136 | control60no | 1 | 1 |
| nido 136 | control60no | 1 | 1 |
| nido 136 | control60no | 1 | 1 |
| nido 136 | control60no | 1 | 1 |
| nido 136 | control60no | 1 | 1 |
| nido 153 | 60diassi | 1 | 0 |
| nido 153 | 60diassi | 1 | 0 |
| nido 153 | 60diassi | 1 | 0 |
| nido 153 | 60diassi | 1 | 0 |
| nido 153 | 60diassi | 1 | 0 |
| nido 153 | 60diassi | 1 | 0 |
| nido 153 | 60diassi | 1 | 0 |
| nido 153 | 60diassi | 1 | 0 |
| nido 153 | 60diassi | 1 | 0 |
| nido 153 | 60diasno | 1 | 1 |
| nido 153 | 60diasno | 1 | 0 |
| nido 153 | 60diasno | 1 | 0 |
| nido 153 | 60diasno | 1 | 0 |
| nido 153 | 60diasno | 1 | 0 |
| nido 153 | 60diasno | 1 | 0 |
| nido 153 | 60diasno | 1 | 0 |
| nido 153 | 60diasno | 1 | 0 |
| nido 153 | 60diasno | 1 | 0 |
| nido 153 | control60si | 1 | 1 |
| nido 153 | control60si | 1 | 1 |
| nido 153 | control60si | 1 | 1 |
| nido 153 | control60si | 1 | 1 |
| nido 153 | control60si | 1 | 1 |
| nido 153 | control60si | 1 | 1 |
| nido 153 | control60si | 1 | 1 |
| nido 153 | control60si | 1 | 1 |
| nido 153 | control60si | 1 | 1 |
| nido 153 | control60no | 1 | 1 |
| nido 153 | control60no | 1 | 1 |
| nido 153 | control60no | 1 | 1 |
| nido 153 | control60no | 1 | 1 |
| nido 153 | control60no | 1 | 1 |
| nido 153 | control60no | 1 | 1 |
| nido 153 | control60no | 1 | 1 |
| nido 153 | control60no | 1 | 1 |
| nido 153 | control60no | 1 | 1 |

Size and mass (30 days)

| **N° de nido** | **trat** | **LHC** | **PESO** |
| --- | --- | --- | --- |
| **29** | control30no | 11,5 | 54,1 |
| **29** | control30no | 11,5 | 52,5 |
| **29** | control30no | 11,0 | 47,2 |
| **29** | control30no | 11,2 | 52,2 |
| **29** | control30no | 11,0 | 50,8 |
| **29** | control30no | 11,0 | 58,8 |
| **29** | control30no | 11,0 | 48,5 |
| **29** | control30no | . | . |
| **29** | control30no | 11,3 | 56,0 |
| **29** | control30si | 12,0 | 54,5 |
| **29** | control30si | 11,5 | 54,0 |
| **29** | control30si | 11,5 | 55,8 |
| **29** | control30si | 11,5 | 55,8 |
| **29** | control30si | 11,0 | 51,2 |
| **29** | control30si | 11,8 | 56,4 |
| **29** | control30si | 11,5 | 52,3 |
| **29** | control30si | 11,5 | 49,6 |
| **29** | control30si | 11,5 | 55,0 |
| **29** | 30no | 11,0 | 53,6 |
| **29** | 30no | 11,8 | 51,8 |
| **29** | 30no | 11,0 | 58,1 |
| **29** | 30no |  |  |
| **29** | 30no |  |  |
| **29** | 30no | 11,0 | 49,2 |
| **29** | 30no | 11,0 | 56,0 |
| **29** | 30no | 11,3 | 51,0 |
| **29** | 30no | 11,7 | 50,8 |
| **29** | 30si | 11,0 | 55,1 |
| **29** | 30si |  |  |
| **29** | 30si |  |  |
| **29** | 30si | 12,0 | 57,1 |
| **29** | 30si |  |  |
| **29** | 30si | 12,0 | 48,7 |
| **29** | 30si | 10,5 | 34,0 |
| **29** | 30si |  |  |
| **29** | 30si |  |  |
| **33** | control30no | 11,3 | 51 |
| **33** | control30no | 12 | 53,2 |
| **33** | control30no |  |  |
| **33** | control30no | 11,5 | 50,1 |
| **33** | control30no | 12 | 53,3 |
| **33** | control30no |  |  |
| **33** | control30no | 11,5 | 50,2 |
| **33** | control30no | 11,2 | 51,9 |
| **33** | control30no | 11 | 50,1 |
| **33** | control30si | 11,5 | 50,5 |
| **33** | control30si | 11 | 49,5 |
| **33** | control30si | 11,5 | 48,6 |
| **33** | control30si | 10,8 | 50,6 |
| **33** | control30si | 11,5 | 51,6 |
| **33** | control30si | 11,5 | 48,5 |
| **33** | control30si | 10 | 44,3 |
| **33** | control30si | 11 | 50,3 |
| **33** | control30si | 11,5 | 52,5 |
| **33** | 30no | 11 | 52,1 |
| **33** | 30no | 11,2 | 50,1 |
| **33** | 30no | 11,5 | 52,3 |
| **33** | 30no |  |  |
| **33** | 30no |  |  |
| **33** | 30no | 11 | 55,1 |
| **33** | 30no | 11 | 49,7 |
| **33** | 30no | 11 | 51,9 |
| **33** | 30no | 10,5 | 53,6 |
| **33** | 30si |  |  |
| **33** | 30si |  |  |
| **33** | 30si |  |  |
| **33** | 30si | 11,5 | 50,7 |
| **33** | 30si | 11,5 | 51,7 |
| **33** | 30si | 11,5 | 51,5 |
| **33** | 30si | 11 | 52,9 |
| **33** | 30si |  |  |
| **33** | 30si | 11,5 | 51,6 |
| **49** | control30no | 10,5 | 47 |
| **49** | control30no | 10,5 | 43,7 |
| **49** | control30no | 11 | 48,5 |
| **49** | control30no | 10,5 | 51,5 |
| **49** | control30no | 11,5 | 49,5 |
| **49** | control30no | 10,2 | 42 |
| **49** | control30no | 11,5 | 50,5 |
| **49** | control30no |  |  |
| **49** | control30no | 11 | 46,9 |
| **49** | control30si | 11 | 47 |
| **49** | control30si | 12 | 51,3 |
| **49** | control30si |  |  |
| **49** | control30si | 11 | 44,7 |
| **49** | control30si | 10,5 | 46,5 |
| **49** | control30si | 11,5 | 51,7 |
| **49** | control30si | 10 | 43,9 |
| **49** | control30si | 11 | 43,1 |
| **49** | control30si |  |  |
| **49** | 30no | 10,5 | 43,1 |
| **49** | 30no | 10,5 | 48,7 |
| **49** | 30no | 11 | 51,7 |
| **49** | 30no | 11,3 | 48,5 |
| **49** | 30no | 11,5 | 52,9 |
| **49** | 30no |  |  |
| **49** | 30no | 10,5 | 46,1 |
| **49** | 30no | 11,5 | 54,1 |
| **49** | 30no | 11 | 48,1 |
| **49** | 30si | 10 | 45,2 |
| **49** | 30si |  |  |
| **49** | 30si | 7 | 40,6 |
| **49** | 30si |  |  |
| **49** | 30si |  |  |
| **49** | 30si |  |  |
| **49** | 30si | 11,5 | 48,6 |
| **49** | 30si |  |  |
| **49** | 30si | 11,5 | 55,3 |
| **149** | control30no | 10,5 | 37,8 |
| **149** | control30no | 10,5 | 39,3 |
| **149** | control30no | 11 | 40,2 |
| **149** | control30no | 10,8 | 38,7 |
| **149** | control30no | 11 | 41,5 |
| **149** | control30no | 11 | 39,9 |
| **149** | control30no | 10,5 | 38,8 |
| **149** | control30no | 10,3 | 38 |
| **149** | control30no | 11 | 37,7 |
| **149** | control30si | 11 | 41 |
| **149** | control30si | 11,3 | 41,5 |
| **149** | control30si | 10 | 35,5 |
| **149** | control30si | 10,5 | 39,2 |
| **149** | control30si | 10,8 | 39,9 |
| **149** | control30si | 10 | 35,5 |
| **149** | control30si | 9,3 | 37,8 |
| **149** | control30si | 10 | 36,6 |
| **149** | control30si |  |  |
| **149** | 30no | 10,5 | 38,6 |
| **149** | 30no |  | 36,3 |
| **149** | 30no | 10,5 | 39,4 |
| **149** | 30no | 10,5 | 36,3 |
| **149** | 30no |  |  |
| **149** | 30no | 10,5 | 40,1 |
| **149** | 30no | 11 | 40,9 |
| **149** | 30no | 10,5 | 37,8 |
| **149** | 30no | 10 | 37 |
| **149** | 30si | 11 | 39,1 |
| **149** | 30si | 10,5 | 39,1 |
| **149** | 30si |  |  |
| **149** | 30si | 10,8 | 38,2 |
| **149** | 30si | 11 | 30,8 |
| **149** | 30si |  |  |
| **149** | 30si | 10 | 38 |
| **149** | 30si | 10 | 39,8 |
| **149** | 30si | 10,5 | 35,2 |

Size and mass (60 days)

| **N° de nido** | **trat** | **LT** | **LHC** | **PESO** |
| --- | --- | --- | --- | --- |
| 72 | control60no | 23,8 | 11,8 | 51,6 |
| 72 | control60no | 24 | 12 | 50,5 |
| 72 | control60no | 24 | 11,8 | 52 |
| 72 | control60no | 23,8 | 11,8 | 48,8 |
| 72 | control60no | 23,2 | 11,5 | 50,5 |
| 72 | control60no | 22 | 10,8 | 45,8 |
| 72 | control60no | 23,5 | 11,5 | 50,2 |
| 72 | control60no | 23,8 | 11,5 | 47,6 |
| 72 | control60no | 23,2 | 11,3 | 47,5 |
| 72 | control60si | 23,7 | 11,5 | 50,1 |
| 72 | control60si | 24 | 12 | 50,1 |
| 72 | control60si | 24,5 | 12 | 50 |
| 72 | control60si | 23,5 | 12 | 50,4 |
| 72 | control60si | 20,5 | 10 | 44,7 |
| 72 | control60si | 22,5 | 11,3 | 46,1 |
| 72 | control60si | 23,7 | 11,5 | 48,7 |
| 72 | control60si | 24,5 | 11,8 | 48,3 |
| 72 | control60si | 24 | 11,5 | 49,2 |
| 72 | 60no |  |  |  |
| 72 | 60no |  |  |  |
| 72 | 60no |  |  |  |
| 72 | 60no |  |  |  |
| 72 | 60no |  |  |  |
| 72 | 60no |  |  |  |
| 72 | 60no |  |  |  |
| 72 | 60no | 24 | 12 | 52,6 |
| 72 | 60no |  |  |  |
| 72 | 60si |  |  |  |
| 72 | 60si |  |  |  |
| 72 | 60si |  |  |  |
| 72 | 60si |  |  |  |
| 72 | 60si |  |  |  |
| 72 | 60si |  |  |  |
| 72 | 60si |  |  |  |
| 72 | 60si |  |  |  |
| 72 | 60si |  |  |  |
| 95 | control60no | 22,8 | 11,2 | 45,2 |
| 95 | control60no | 23,5 | 11,5 | 41,9 |
| 95 | control60no | 24,5 | 11,8 | 50,5 |
| 95 | control60no | 24 | 11,5 | 45,5 |
| 95 | control60no |  |  |  |
| 95 | control60no | 24 | 11,5 | 46,1 |
| 95 | control60no | 24,5 | 11,5 | 47,4 |
| 95 | control60no |  |  |  |
| 95 | control60no |  |  |  |
| 95 | control60si | 24 | 12 | 47,1 |
| 95 | control60si | 24,8 | 12,1 | 49,8 |
| 95 | control60si |  |  |  |
| 95 | control60si | 24,8 | 11,8 | 49,7 |
| 95 | control60si | 22,5 | 11,5 | 47,4 |
| 95 | control60si | 24,8 | 12 | 52,3 |
| 95 | control60si | 14,5 | 1,7 | 45,3 |
| 95 | control60si | 24,5 | 11,8 | 48,3 |
| 95 | control60si | 25 | 12,2 | 45,7 |
| 95 | 60no |  |  |  |
| 95 | 60no |  |  |  |
| 95 | 60no |  |  |  |
| 95 | 60no |  |  |  |
| 95 | 60no |  |  |  |
| 95 | 60no |  |  |  |
| 95 | 60no |  |  |  |
| 95 | 60no |  |  |  |
| 95 | 60no |  |  |  |
| 95 | 60si |  |  |  |
| 95 | 60si |  |  |  |
| 95 | 60si |  |  |  |
| 95 | 60si |  |  |  |
| 95 | 60si |  |  |  |
| 95 | 60si |  |  |  |
| 95 | 60si |  |  |  |
| 95 | 60si |  |  |  |
| 95 | 60si |  |  |  |
| 136 | control60no | 22,8 | 10,5 | 50,3 |
| 136 | control60no | 23 | 11 | 47,4 |
| 136 | control60no | 23,5 | 11 | 49,3 |
| 136 | control60no | 24,3 | 11,5 | 49,7 |
| 136 | control60no | 23,5 | 11 | 47,7 |
| 136 | control60no | 23,8 | 11,5 | 49,6 |
| 136 | control60no | 23 | 11 | 45 |
| 136 | control60no | 24 | 11,5 | 52,4 |
| 136 | control60no | 23,6 | 11,5 | 49,7 |
| 136 | control60si | 23,5 | 11,5 | 50,9 |
| 136 | control60si | 23,3 | 11 | 49,1 |
| 136 | control60si | 22,5 | 10,5 | 47,8 |
| 136 | control60si | 22 | 10,5 | 45 |
| 136 | control60si | 23,5 | 11,5 | 49,1 |
| 136 | control60si | 22,3 | 11 | 50,1 |
| 136 | control60si | 22 | 10,5 | 47,1 |
| 136 | control60si | 23 | 10,5 | 49,4 |
| 136 | control60si | 22 | 10,5 | 47,9 |
| 136 | 60no |  |  |  |
| 136 | 60no |  |  |  |
| 136 | 60no |  |  |  |
| 136 | 60no |  |  |  |
| 136 | 60no |  |  |  |
| 136 | 60no |  |  |  |
| 136 | 60no |  |  |  |
| 136 | 60no |  |  |  |
| 136 | 60no |  |  |  |
| 136 | 60si |  |  |  |
| 136 | 60si |  |  |  |
| 136 | 60si |  |  |  |
| 136 | 60si |  |  |  |
| 136 | 60si |  |  |  |
| 136 | 60si |  |  |  |
| 136 | 60si |  |  |  |
| 136 | 60si |  |  |  |
| 136 | 60si |  |  |  |
| 153 | control60no | 24 | 11,5 | 51,1 |
| 153 | control60no | 22,5 | 11,3 | 47,5 |
| 153 | control60no | 23,3 | 11,5 | 51,1 |
| 153 | control60no | 22,5 | 11 | 44,4 |
| 153 | control60no | 22,5 | 11 | 49 |
| 153 | control60no | 22 | 11,8 | 46,2 |
| 153 | control60no | 24,5 | 12 | 54,1 |
| 153 | control60no | 24 | 11,5 | 51 |
| 153 | control60no | 21,5 | 12 | 55,2 |
| 153 | control60si | 24 | 11,2 | 53,9 |
| 153 | control60si | 24,8 | 12,3 | 54,5 |
| 153 | control60si | 23,7 | 12 | 53,3 |
| 153 | control60si | 21,5 | 11 | 45,5 |
| 153 | control60si | 24 | 11,3 | 51,4 |
| 153 | control60si | 24 | 11,5 | 52,2 |
| 153 | control60si | 23 | 11,3 | 49,9 |
| 153 | control60si | 24 | 11,5 | 50,3 |
| 153 | control60si | 23,5 | 11,5 | 52,8 |
| 153 | 60no |  |  |  |
| 153 | 60no |  |  |  |
| 153 | 60no |  |  |  |
| 153 | 60no |  |  |  |
| 153 | 60no |  |  |  |
| 153 | 60no |  |  |  |
| 153 | 60no |  |  |  |
| 153 | 60no |  |  |  |
| 153 | 60no | 21,5 | 10,5 | 44,7 |
| 153 | 60si |  |  |  |
| 153 | 60si |  |  |  |
| 153 | 60si |  |  |  |
| 153 | 60si |  |  |  |
| 153 | 60si |  |  |  |
| 153 | 60si |  |  |  |
| 153 | 60si |  |  |  |
| 153 | 60si |  |  |  |
| 153 | 60si |  |  |  |

Malformations (30 days).

| **nido** | **trat** | **cantidad** | **nacidos** | **malformaciones** |
| --- | --- | --- | --- | --- |
| **29** | control30no | 1,0 | 1,0 | 0 |
| **29** | control30no | 1,0 | 1,0 | 1,0 |
| **29** | control30no | 1,0 | 1,0 | 0 |
| **29** | control30no | 1,0 | 1,0 | 0 |
| **29** | control30no | 1,0 | 1,0 | 0 |
| **29** | control30no | 1,0 | 1,0 | 0 |
| **29** | control30no | 1,0 | 1,0 | 1,0 |
| **29** | control30no | 1,0 | 0,0 | 0 |
| **29** | control30no | 1,0 | 1,0 | 0 |
| **29** | control30si | 1,0 | 1,0 | 0 |
| **29** | control30si | 1,0 | 1,0 | 0 |
| **29** | control30si | 1,0 | 1,0 | 0 |
| **29** | control30si | 1,0 | 1,0 | 1,0 |
| **29** | control30si | 1,0 | 1,0 | 0 |
| **29** | control30si | 1,0 | 1,0 | 0 |
| **29** | control30si | 1,0 | 1,0 | 0 |
| **29** | control30si | 1,0 | 1,0 | 1,0 |
| **29** | control30si | 1,0 | 1,0 | 0 |
| **29** | 30diasno | 1,0 | 1,0 | 1,0 |
| **29** | 30diasno | 1,0 | 1,0 | 1,0 |
| **29** | 30diasno | 1,0 | 1,0 | 1,0 |
| **29** | 30diasno | 1,0 | 0,0 | 0 |
| **29** | 30diasno | 1,0 | 0,0 | 0 |
| **29** | 30diasno | 1,0 | 1,0 | 0 |
| **29** | 30diasno | 1,0 | 1,0 | 0 |
| **29** | 30diasno | 1,0 | 1,0 | 1,0 |
| **29** | 30diasno | 1,0 | 1,0 | 1,0 |
| **29** | 30diassi | 1,0 | 1,0 | 0 |
| **29** | 30diassi | 1,0 | 0,0 | 0 |
| **29** | 30diassi | 1,0 | 0,0 | 0 |
| **29** | 30diassi | 1,0 | 1,0 | 1,0 |
| **29** | 30diassi | 1,0 | 0,0 | 0 |
| **29** | 30diassi | 1,0 | 1,0 | 1,0 |
| **29** | 30diassi | 1,0 | 1,0 | 1,0 |
| **29** | 30diassi | 1,0 | 0,0 | 0 |
| **29** | 30diassi | 1,0 | 0,0 | 0 |
| **33** | control30no | 1,0 | 1,0 | 0 |
| **33** | control30no | 1,0 | 1,0 | 0 |
| **33** | control30no | 1,0 | 0,0 | 0 |
| **33** | control30no | 1,0 | 1,0 | 1,0 |
| **33** | control30no | 1,0 | 1,0 | 0 |
| **33** | control30no | 1,0 | 0,0 | 0 |
| **33** | control30no | 1,0 | 1,0 | 0 |
| **33** | control30no | 1,0 | 1,0 | 0 |
| **33** | control30no | 1,0 | 1,0 | 1,0 |
| **33** | control30si | 1,0 | 1,0 | 0 |
| **33** | control30si | 1,0 | 1,0 | 1,0 |
| **33** | control30si | 1,0 | 1,0 | 0 |
| **33** | control30si | 1,0 | 1,0 | 0 |
| **33** | control30si | 1,0 | 1,0 | 0 |
| **33** | control30si | 1,0 | 1,0 | 0 |
| **33** | control30si | 1,0 | 1,0 | 0 |
| **33** | control30si | 1,0 | 1,0 | 0 |
| **33** | control30si | 1,0 | 1,0 | 0 |
| **33** | 30diasno | 1,0 | 1,0 | 1,0 |
| **33** | 30diasno | 1,0 | 1,0 | 0 |
| **33** | 30diasno | 1,0 | 1,0 | 1,0 |
| **33** | 30diasno | 1,0 | 0,0 | 0 |
| **33** | 30diasno | 1,0 | 0,0 | 0 |
| **33** | 30diasno | 1,0 | 1,0 | 1,0 |
| **33** | 30diasno | 1,0 | 1,0 | 1,0 |
| **33** | 30diasno | 1,0 | 1,0 | 0 |
| **33** | 30diasno | 1,0 | 1,0 | 1,0 |
| **33** | 30diassi | 1,0 | 0,0 | 0 |
| **33** | 30diassi | 1,0 | 0,0 | 0 |
| **33** | 30diassi | 1,0 | 0,0 | 0,0 |
| **33** | 30diassi | 1,0 | 1,0 | 1,0 |
| **33** | 30diassi | 1,0 | 1,0 | 0 |
| **33** | 30diassi | 1,0 | 1,0 | 0 |
| **33** | 30diassi | 1,0 | 1,0 | 1,0 |
| **33** | 30diassi | 1,0 | 0,0 | 0 |
| **33** | 30diassi | 1,0 | 1,0 | 0 |
| **49** | control30no | 1,0 | 1,0 | 0 |
| **49** | control30no | 1,0 | 1,0 | 0 |
| **49** | control30no | 1,0 | 1,0 | 1,0 |
| **49** | control30no | 1,0 | 1,0 | 0 |
| **49** | control30no | 1,0 | 1,0 | 0 |
| **49** | control30no | 1,0 | 1,0 | 0 |
| **49** | control30no | 1,0 | 1,0 | 0 |
| **49** | control30no | 1,0 | 0,0 | 0 |
| **49** | control30no | 1,0 | 1,0 | 0 |
| **49** | control30si | 1,0 | 1,0 | 0 |
| **49** | control30si | 1,0 | 1,0 | 1,0 |
| **49** | control30si | 1,0 | 0,0 | 0 |
| **49** | control30si | 1,0 | 1,0 | 0 |
| **49** | control30si | 1,0 | 1,0 | 1,0 |
| **49** | control30si | 1,0 | 1,0 | 0 |
| **49** | control30si | 1,0 | 1,0 | 1,0 |
| **49** | control30si | 1,0 | 1,0 | 0 |
| **49** | control30si | 1,0 | 0,0 | 0 |
| **49** | 30diasno | 1,0 | 1,0 | 0 |
| **49** | 30diasno | 1,0 | 1,0 | 0 |
| **49** | 30diasno | 1,0 | 1,0 | 1,0 |
| **49** | 30diasno | 1,0 | 1,0 | 0 |
| **49** | 30diasno | 1,0 | 1,0 | 0 |
| **49** | 30diasno | 1,0 | 0,0 | 0 |
| **49** | 30diasno | 1,0 | 1,0 | 1,0 |
| **49** | 30diasno | 1,0 | 1,0 | 0 |
| **49** | 30diasno | 1,0 | 1,0 | 1,0 |
| **49** | 30diassi | 1,0 | 1,0 | 1,0 |
| **49** | 30diassi | 1,0 | 0,0 | 0 |
| **49** | 30diassi | 1,0 | 1,0 | 1,0 |
| **49** | 30diassi | 1,0 | 0,0 | 0 |
| **49** | 30diassi | 1,0 | 0,0 | 0 |
| **49** | 30diassi | 1,0 | 0,0 | 0 |
| **49** | 30diassi | 1,0 | 1,0 | 1,0 |
| **49** | 30diassi | 1,0 | 0,0 | 0 |
| **49** | 30diassi | 1,0 | 1,0 | 1,0 |
| **149** | control30no | 1,0 | 1,0 | 0 |
| **149** | control30no | 1,0 | 1,0 | 0 |
| **149** | control30no | 1,0 | 1,0 | 0 |
| **149** | control30no | 1,0 | 1,0 | 0 |
| **149** | control30no | 1,0 | 1,0 | 1,0 |
| **149** | control30no | 1,0 | 1,0 | 0 |
| **149** | control30no | 1,0 | 1,0 | 0 |
| **149** | control30no | 1,0 | 1,0 | 0 |
| **149** | control30no | 1,0 | 1,0 | 0 |
| **149** | control30si | 1,0 | 1,0 | 0 |
| **149** | control30si | 1,0 | 1,0 | 0 |
| **149** | control30si | 1,0 | 1,0 | 0 |
| **149** | control30si | 1,0 | 1,0 | 0 |
| **149** | control30si | 1,0 | 1,0 | 1,0 |
| **149** | control30si | 1,0 | 1,0 | 0 |
| **149** | control30si | 1,0 | 1,0 | 1,0 |
| **149** | control30si | 1,0 | 1,0 | 1,0 |
| **149** | control30si | 1,0 | 0,0 | 0 |
| **149** | 30diasno | 1,0 | 1,0 | 0 |
| **149** | 30diasno | 1,0 | 1,0 | 0 |
| **149** | 30diasno | 1,0 | 1,0 | 0 |
| **149** | 30diasno | 1,0 | 1,0 | 1,0 |
| **149** | 30diasno | 1,0 | 0,0 | 0 |
| **149** | 30diasno | 1,0 | 1,0 | 1,0 |
| **149** | 30diasno | 1,0 | 1,0 | 1,0 |
| **149** | 30diasno | 1,0 | 1,0 | 0 |
| **149** | 30diasno | 1,0 | 1,0 | 1,0 |
| **149** | 30diassi | 1,0 | 1,0 | 0 |
| **149** | 30diassi | 1,0 | 1,0 | 1,0 |
| **149** | 30diassi | 1,0 | 0,0 | 0 |
| **149** | 30diassi | 1,0 | 1,0 | 0 |
| **149** | 30diassi | 1,0 | 1,0 | 0 |
| **149** | 30diassi | 1,0 | 0,0 | 0 |
| **149** | 30diassi | 1,0 | 1,0 | 1,0 |
| **149** | 30diassi | 1,0 | 1,0 | 0 |
| **149** | 30diassi | 1,0 | 1,0 | 1,0 |
